# Supplementary material for: Emotional processes, collective behavior, and social movements: A meta-analytic review of collective effervescence outcomes during collective gatherings and demonstrations
Source: PubMed Central journal article supplement (PMC9473704; doi:10.3389/fpsyg.2022.974683), 2022-08-31
Supplement: Data_Sheet_1.pdf [file Data_Sheet_1.pdf]

Supplementary Table S1.

*Pooled Correlations between Collective Effervescence and Criterion Variables Moderated by Study Design.*

| Dimension                 | Variable               | Residual Heterogeneity                 | Test of Moderators                   | <i>k</i> | <i>N</i>          | Effect Size         |
|---------------------------|------------------------|----------------------------------------|--------------------------------------|----------|-------------------|---------------------|
|                           |                        | <i>QE(df)</i>                          | <i>QM(df)</i>                        |          |                   | <i>r</i> [95% CI]   |
| <i>Proximal Outcomes</i>  |                        |                                        |                                      |          |                   |                     |
| Individual Emotions       | Arousal                | <i>QE</i> (12)=178.723, <i>p</i> <.001 | <i>QM</i> (1)=3.052, <i>p</i> =.081  | 5        | 47311             | .312 [.126, .499]   |
|                           |                        |                                        |                                      | 9        | 1005              | .525 [.377, .673]   |
|                           | Negative Emotions      | <i>QE</i> (12)=32.890, <i>p</i> =.001  | <i>QM</i> (1)=5.619, <i>p</i> =.018  | 5        | 1023              | .160 [.035, .284]   |
|                           |                        |                                        |                                      | 9        | 1005              | -.046 [-.162, .070] |
|                           | Positive Emotions      | <i>QE</i> (20)=239.186, <i>p</i> <.001 | <i>QM</i> (1)=4.196, <i>p</i> =.041  | 11       | 4320              | .471 [.367, .576]   |
|                           |                        |                                        | 11                                   | 1514     | .628 [.521, .735] |                     |
|                           | ST Emotions            | <i>QE</i> (15)=171.261, <i>p</i> <.001 | <i>QM</i> (1)=1.586, <i>p</i> =.208  | 9        | 4299              | .535 [.434, .635]   |
|                           |                        |                                        |                                      | 8        | 1041              | .634 [.517, .750]   |
| Communal Sharing          | Ingroup ID             | <i>QE</i> (12)=295.187, <i>p</i> <.001 | <i>QM</i> (1)=0.231, <i>p</i> =.631  | 8        | 2349              | .433 [.287, .578]   |
|                           |                        |                                        |                                      | 6        | 904               | .489 [.312, .666]   |
|                           | FI Pictorial           | <i>QE</i> (9)=26.905, <i>p</i> =.001   | <i>QM</i> (1)=1.145, <i>p</i> =.285  | 3        | 609               | .274 [.109, .440]   |
|                           |                        |                                        |                                      | 8        | 895               | .386 [.265, .507]   |
| <i>Distal Outcomes</i>    |                        |                                        |                                      |          |                   |                     |
| Social Integration        | Ingroup ID (extended)  | <i>QE</i> (6)=94.263, <i>p</i> <.001   | <i>QM</i> (2)=22.539, <i>p</i> <.001 | 5        | 74221             | .332 [.164, .500]   |
|                           |                        |                                        |                                      | 2        | 918               | .300 [.085, .516]   |
| Social Values and Beliefs | Purpose in Life        | <i>QE</i> (6)=274.021, <i>p</i> <.001  | <i>QM</i> (1)=0.150, <i>p</i> =.698  | 5        | 3853              | .375 [.205, .545]   |
|                           |                        |                                        |                                      | 3        | 625               | .316 [.070, .562]   |
|                           | Wellbeing              | <i>QE</i> (15)=158.084, <i>p</i> <.001 | <i>QM</i> (1)=0.785, <i>p</i> =.376  | 8        | 4607              | .280 [.168, .393]   |
|                           |                        |                                        |                                      | 9        | 1581              | .354 [.235, .473]   |
| Empowerment               | Collective Self-Esteem | <i>QE</i> (5)=35.954, <i>p</i> <.001   | <i>QM</i> (1)=3.316, <i>p</i> =.069  | 3        | 762               | .544 [.360, .729]   |
|                           |                        |                                        |                                      | 4        | 735               | .300 [.113, .487]   |

## CE META-ANALYSIS

*Note.*  $k$  is the number of studies and  $N$  the number of participants included in the analysis.  $r$  [95% CI] indicates pooled Pearson's  $r$ s and their 95% confidence intervals.  $QE(df)$  indicate the  $Q$  test of the residual heterogeneity test (i.e., after the moderation) and its degrees of freedom;  $QM(df)$  indicate the  $Q$  test of comparison between the effect sizes between the levels of the moderator and its degrees of freedom. Moderator levels of type of gathering are 1 = Cross-sectional and 2 = Longitudinal design. The variables not included here were due to no having reached the minimum condition for moderation analyses (i.e.,  $k = 3$ ).

## CE META-ANALYSIS

Supplementary Table S2.

*Pooled Correlations between Collective Effervescence and Criterion Variables Moderated by CE Scale.*

| Dimension                 | Variable              | Residual Heterogeneity                 | Test of Moderators                  | <i>k</i> | <i>N</i> | Effect Size       |
|---------------------------|-----------------------|----------------------------------------|-------------------------------------|----------|----------|-------------------|
|                           |                       | <i>QE(df)</i>                          | <i>QM(df)</i>                       |          |          | <i>r</i> [95% CI] |
| <i>Proximal Outcomes</i>  |                       |                                        |                                     |          |          |                   |
|                           | Ingroup ID            | <i>QE</i> (12)=179.084, <i>p</i> <.001 | <i>QM</i> (1)=5.132, <i>p</i> =.023 | 10       | 1522     | .529 [.416, .643] |
|                           |                       |                                        |                                     | 4        | 1731     | .286 [.110, .463] |
| Communal Sharing          | Social Support        | <i>QE</i> (8)=61.558, <i>p</i> <.001   | <i>QM</i> (1)=0.121, <i>p</i> =.728 | -        | -        |                   |
|                           |                       |                                        |                                     | 5        | 1232     | .355 [.228, .482] |
|                           |                       |                                        |                                     | 2        | 1592     |                   |
|                           |                       |                                        |                                     | 5        | 1311     | .387 [.262, .512] |
| <i>Distal Outcomes</i>    |                       |                                        |                                     |          |          |                   |
|                           | Ingroup Commitment    | <i>QE</i> (4)=1471.167, <i>p</i> <.001 | <i>QM</i> (1)=0.075, <i>p</i> =.784 | 3        | 911      | .340 [.182, .499] |
|                           |                       |                                        |                                     | 1        | 409      |                   |
| Social Integration        | Ingroup ID (extended) | <i>QE</i> (5)=93.612, <i>p</i> <.001   | <i>QM</i> (1)=0.158, <i>p</i> =.691 | 3        | 122642   | .371 [.221, .521] |
|                           |                       |                                        |                                     | 4        | 922      | .314 [.118, .510] |
|                           |                       |                                        |                                     | 1        | 416      |                   |
|                           |                       |                                        |                                     | 3        | 73801    | .374 [.155, .593] |
| Social Values and Beliefs | Purpose in Life       | <i>QE</i> (6)=107.546, <i>p</i> <.001  | <i>QM</i> (1)=1.158, <i>p</i> =.282 | 5        | 3561     | .296 [.124, .468] |
|                           |                       |                                        |                                     | 3        | 917      | .442 [.240, .644] |
| Empowerment               | Wellbeing             | <i>QE</i> (14)=120.920, <i>p</i> <.001 | <i>QM</i> (1)=0.128, <i>p</i> =.721 | 12       | 5025     | .328 [.224, .432] |
|                           |                       |                                        |                                     | 1        | 495      |                   |
|                           |                       |                                        |                                     | 4        | 668      | .291 [.114, .467] |

*Note* *k* is the number of studies and *N* the number of participants included in the analysis. *r* [95% CI] indicates pooled Pearson's *r*s and their 95% confidence intervals. *QE(df)* indicate the *Q* test of the residual heterogeneity test (i.e., after the moderation) and its degrees of freedom; *QM(df)* indicate the *Q* test of comparison between the effect sizes between the levels of the moderator and its degrees of freedom. Moderator

## **CE META-ANALYSIS**

levels of type of gathering are 1 = PES and 2 = Positive Emotionality, and 3 = Other scale. The variables not included here were due to no having reached the minimum condition for moderation analyses (i.e.,  $k = 3$ ).

## CE META-ANALYSIS

Supplementary Table S3.

*Pooled Correlations between Collective Effervescence and Criterion Variables Moderated by PES Scale Length.*

| Dimension                | Variable          | Residual Heterogeneity                 | Test of Moderators                  | <i>k</i> | <i>N</i> | Effect Size        |
|--------------------------|-------------------|----------------------------------------|-------------------------------------|----------|----------|--------------------|
|                          |                   | <i>QE(df)</i>                          | <i>QM(df)</i>                       |          |          | <i>r</i> [95% CI]  |
| <i>Proximal Outcomes</i> |                   |                                        |                                     |          |          |                    |
| Individual Emotions      | Arousal           | <i>QE</i> (11)=161.327, <i>p</i> <.001 | <i>QM</i> (1)=0.848, <i>p</i> =.357 | 8        | 836      | .384 [.212, .556]  |
|                          |                   |                                        |                                     | 5        | 909      | .516 [.295, .736]  |
|                          | Negative Emotions | <i>QE</i> (11)=70.612, <i>p</i> <.001  | <i>QM</i> (1)=0.547, <i>p</i> =.460 | 7        | 771      | .012 [-.143, .166] |
|                          |                   |                                        |                                     | 6        | 1107     | .099 [-.074, .272] |
|                          |                   |                                        |                                     | 13       | 4386     | .616 [.522, .710]  |
| Communal Sharing         | Positive Emotions | <i>QE</i> (18)=165.504, <i>p</i> <.001 | <i>QM</i> (1)=2.827, <i>p</i> =.093 | 7        | 1200     | .474 [.337, .610]  |
|                          |                   |                                        |                                     | 12       | 4431     | .592 [.498, .686]  |
|                          |                   |                                        |                                     | 5        | 909      | .528 [.367, .688]  |
| Communal Sharing         | Ingroup ID        | <i>QE</i> (8)=45.364, <i>p</i> <.001   | <i>QM</i> (1)=0.682, <i>p</i> =.409 | 4        | 462      | .487 [.342, .633]  |
|                          |                   |                                        |                                     | 6        | 1060     | .568 [.444, .691]  |
|                          |                   |                                        |                                     | 7        | 871      | .319 [.199, .439]  |
| Empowerment              | FI Pictorial      | <i>QE</i> (9)=27.751, <i>p</i> =.001   | <i>QM</i> (1)=0.668, <i>p</i> =.414 | 4        | 633      | .410 [.229, .590]  |
|                          |                   |                                        |                                     |          |          |                    |
| <i>Distal Outcomes</i>   |                   |                                        |                                     |          |          |                    |
| Empowerment              | Wellbeing         | <i>QE</i> (10)=104.703, <i>p</i> <.001 | <i>QM</i> (1)=0.049, <i>p</i> =.826 | 7        | 4116     | .334 [.188, .481]  |
|                          |                   |                                        |                                     | 5        | 909      | .307 [.112, .502]  |

*Note.* *k* is the number of studies and *N* the number of participants included in the analysis. *r* [95% CI] indicates pooled Pearson's *r*s and their 95% confidence intervals. *QE(df)* indicate the *Q* test of the residual heterogeneity test (i.e., after the moderation) and its degrees of freedom; *QM(df)* indicate the *Q* test of comparison between the effect sizes between the levels of the moderator and its degrees of freedom. Moderator levels of type of gathering are 1 = Short and 2 = Long format of the PES Scale. The variables not included here were due to no having reached the minimum condition for moderation analyses (i.e., *k* = 3).

## CE META-ANALYSIS

Supplementary Table S4.

*Pooled Correlations between Collective Effervescence and Criterion Variables Moderated by Age and Women Proportion.*

| Dimension                | Variable                              | Residual Heterogeneity                 | Test of Moderators                   | <i>k</i> | <i>N</i>               | Estimate                | Effect Size            |
|--------------------------|---------------------------------------|----------------------------------------|--------------------------------------|----------|------------------------|-------------------------|------------------------|
|                          |                                       | <i>QE(df)</i>                          | <i>QM(df)</i>                        |          |                        |                         | <i>r</i> [95% CI]      |
| <i>Proximal Outcomes</i> |                                       |                                        |                                      |          |                        |                         |                        |
| Individual Emotions      | Arousal                               | <i>QE</i> (10)=128.862, <i>p</i> <.001 | <i>QM</i> (2)=2.749, <i>p</i> =.253  | 13       | 1745                   | Int.                    | -0.636 [-2.163, 0.891] |
|                          |                                       |                                        |                                      |          |                        | $\beta_{\text{Age}}$    | 0.006 [-0.011, 0.023]  |
|                          |                                       |                                        |                                      |          |                        | $\beta_{\text{Women}}$  | 0.013 [-0.003, 0.029]  |
|                          | Negative Emotions                     | <i>QE</i> (11)=64.891, <i>p</i> <.001  | <i>QM</i> (2)=0.103, <i>p</i> =.950  | 14       | 2028                   | Int.                    | 0.200 [-0.749, 1.150]  |
|                          |                                       |                                        |                                      |          |                        | $\beta_{\text{Age}}$    | -0.002 [-0.015, 0.011] |
|                          |                                       |                                        |                                      |          |                        | $\beta_{\text{Women}}$  | -0.002 [-0.012, 0.009] |
|                          | Positive Emotions                     | <i>QE</i> (19)=129.217, <i>p</i> <.001 | <i>QM</i> (2)=13.866, <i>p</i> <.001 | 22       | 5834                   | Int.                    | -0.196 [-0.624, 0.231] |
|                          |                                       |                                        |                                      |          |                        | $\beta_{\text{Age}}$    | 0.007 [-0.000, 0.014]  |
|                          |                                       |                                        |                                      |          |                        | $\beta_{\text{Women}}$  | 0.008 [0.004, 0.013]   |
|                          | ST Emotions                           | <i>QE</i> (14)=97.876, <i>p</i> <.001  | <i>QM</i> (2)=3.909, <i>p</i> =.142  | 17       | 5340                   | Int.                    | -0.144 [-0.908, 0.620] |
|                          |                                       |                                        |                                      |          |                        | $\beta_{\text{Age}}$    | 0.009 [-0.000, 0.019]  |
|                          |                                       |                                        |                                      |          |                        | $\beta_{\text{Women}}$  | 0.006 [-0.002, 0.014]  |
| Ingroup ID               | <i>QE</i> (10)=63.078, <i>p</i> <.001 | <i>QM</i> (2)=0.408, <i>p</i> =.815    | 13                                   | 2077     | Int.                   | 0.340 [-0.191, 0.871]   |                        |
|                          |                                       |                                        |                                      |          | $\beta_{\text{Age}}$   | 0.001 [-0.009, 0.011]   |                        |
|                          |                                       |                                        |                                      |          | $\beta_{\text{Women}}$ | 0.002 [-0.005, 0.009]   |                        |
| Communal Sharing         | FI Verbal                             | <i>QE</i> (2)=0.631, <i>p</i> =.730    | <i>QM</i> (2)=6.328, <i>p</i> =.042  | 5        | 1031                   | Int.                    | 0.440 [0.197, 0.684]   |
|                          |                                       |                                        |                                      |          |                        | $\beta_{\text{Age}}$    | 0.002 [-0.002, 0.005]  |
|                          |                                       |                                        |                                      |          |                        | $\beta_{\text{Women}}$  | 0.004 [0.001, 0.006]   |
| FI Pictorial             | <i>QE</i> (8)=20.816, <i>p</i> =.008  | <i>QM</i> (2)=3.050, <i>p</i> =.218    | 11                                   | 1504     | Int.                   | -0.641 [-2.234, 0.951]  |                        |
|                          |                                       |                                        |                                      |          | $\beta_{\text{Age}}$   | -0.005 [-0.004, 0.037]  |                        |
|                          |                                       |                                        |                                      |          | $\beta_{\text{Women}}$ | -0.006 [-0.008, 0.023]  |                        |
| Social Support           | <i>QE</i> (7)=47.714, <i>p</i> <.001  | <i>QM</i> (2)=4.170, <i>p</i> =.124    | 10                                   | 2859     | Int.                   | 0.578 [0.261, 0.894]    |                        |
|                          |                                       |                                        |                                      |          | $\beta_{\text{Age}}$   | 0.002 [-0.003, 0.007]   |                        |
|                          |                                       |                                        |                                      |          | $\beta_{\text{Women}}$ | -0.006 [-0.012, -0.000] |                        |
| <i>Distal Outcomes</i>   |                                       |                                        |                                      |          |                        |                         |                        |
|                          | Negative Climate                      | <i>QE</i> (2)=8.746, <i>p</i> =.013    | <i>QM</i> (2)=2.895, <i>p</i> =.235  | 5        | 1357                   | Int.                    | 0.536 [-0.174, 1.245]  |

## CE META-ANALYSIS

|                           |                       |                         |                        |    |       |                 |                         |
|---------------------------|-----------------------|-------------------------|------------------------|----|-------|-----------------|-------------------------|
| Collective Emotions       | Positive Climate      | $QE(1)=1.351, p=.245$   | $QM(2)=18.990, p<.001$ | 4  | 1159  | $\beta_{Age}$   | -0.015 [-0.034, 0.003]  |
|                           |                       |                         |                        |    |       | $\beta_{Women}$ | -0.002 [-0.011, 0.007]  |
|                           | Ingroup Commitment    | $QE(3)=23.403, p<.001$  | $QM(2)=3.415, p=.181$  | 6  | 50766 | Int.            | 0.386 [-0.007, 0.779]   |
|                           |                       |                         |                        |    |       | $\beta_{Age}$   | -0.030 [-0.044, -0.015] |
|                           | Ingroup ID (extended) | $QE(3)=20.831, p<.001$  | $QM(2)=2.546, p=.280$  | 6  | 1436  | $\beta_{Women}$ | 0.009 [0.004, 0.015]    |
|                           |                       |                         |                        |    |       | Int.            | 0.757 [0.310, 1.205]    |
| Social Integration        | ST Beliefs            | $QE(2)=46.748, p<.001$  | $QM(2)=2.373, p=.305$  | 5  | 4231  | $\beta_{Age}$   | -0.002 [-0.010, 0.007]  |
|                           |                       |                         |                        |    |       | $\beta_{Women}$ | -0.006 [-0.012, 0.001]  |
|                           | ST Values             | $QE(1)=0.059, p=.808$   | $QM(2)=2.640, p=.267$  | 4  | 1103  | Int.            | 0.964 [0.174, 1.755]    |
|                           |                       |                         |                        |    |       | $\beta_{Age}$   | -0.004 [-0.012, 0.005]  |
| Social Values and Beliefs | Purpose in Life       | $QE(5)=181.769, p<.001$ | $QM(2)=0.016, p=.992$  | 8  | 4478  | $\beta_{Women}$ | -0.009 [-0.022, 0.004]  |
|                           |                       |                         |                        |    |       | Int.            | -1.302 [-3.557, 0.954]  |
|                           | Spirituality          | $QE(2)=4.017, p=.134$   | $QM(2)=7.503, p=.023$  | 5  | 1416  | $\beta_{Age}$   | 0.023 [-0.010, 0.056]   |
|                           |                       |                         |                        |    |       | $\beta_{Women}$ | 0.015 [-0.004, 0.035]   |
|                           | Vitality              | $QE(2)=3.950, p=.139$   | $QM(2)=1.189, p=.552$  | 5  | 1411  | Int.            | 2.988 [-0.495, 6.471]   |
|                           |                       |                         |                        |    |       | $\beta_{Age}$   | -0.048 [-0.106, 0.011]  |
| Empowerment               | Wellbeing             | $QE(14)=82.063, p<.001$ | $QM(2)=5.120, p=.077$  | 17 | 6188  | $\beta_{Women}$ | -0.022 [-0.054, 0.09]   |
|                           |                       |                         |                        |    |       | Int.            | 0.350 [-0.271, 0.971]   |
|                           | Collective Efficacy   | $QE(4)=11.865, p=.018$  | $QM(2)=1.280, p=.527$  | 7  | 1471  | $\beta_{Age}$   | 0.001 [-0.014, 0.015]   |
|                           |                       |                         |                        |    |       | $\beta_{Women}$ | -0.000 [-0.007, 0.006]  |
|                           |                       |                         |                        |    |       | Int.            | -5000 [-9.378, -0.621]  |
|                           |                       |                         |                        |    |       | $\beta_{Age}$   | 0.015 [0.001, 0.030]    |
|                           |                       |                         |                        |    |       | $\beta_{Women}$ | 0.075 [0.015, 0.135]    |
|                           |                       |                         |                        |    |       | Int.            | -0.619 [-3.414, 2.176]  |
|                           |                       |                         |                        |    |       | $\beta_{Age}$   | 0.013 [-0.022, 0.048]   |
|                           |                       |                         |                        |    |       | $\beta_{Women}$ | 0.007 [-0.021, 0.036]   |
|                           |                       |                         |                        |    |       | Int.            | -0.123 [-0.556, 0.310]  |
|                           |                       |                         |                        |    |       | $\beta_{Age}$   | 0.008 [0.001, 0.016]    |
|                           |                       |                         |                        |    |       | $\beta_{Women}$ | 0.003 [-0.002, 0.008]   |
|                           |                       |                         |                        |    |       | Int.            | 1.047 [0.026, 2.068]    |

## CE META-ANALYSIS

|                        |                        |                       |   |      |                 |                        |
|------------------------|------------------------|-----------------------|---|------|-----------------|------------------------|
| Collective Self-Esteem | $QE(4)=39.796, p<.001$ | $QM(2)=0.828, p=.661$ | 7 | 1497 | $\beta_{Age}$   | -0.007 [-0.021, 0.007] |
|                        |                        |                       |   |      | $\beta_{Women}$ | -0.005 [-0.015, 0.005] |
|                        |                        |                       |   |      | Int.            | 0.781 [-0.051, 1.612]  |
|                        |                        |                       |   |      | $\beta_{Age}$   | -0.004 [-0.018, 0.011] |
|                        |                        |                       |   |      | $\beta_{Women}$ | -0.004 [-0.014, 0.006] |

*Note.*  $k$  is the number of studies and  $N$  the number of participants included in the analysis.  $r$  [95% CI] indicates pooled Pearson's  $r$ s and their 95% confidence intervals.  $QE(df)$  indicate the  $Q$  test of the residual heterogeneity test (i.e., after the moderation) and its degrees of freedom;  $QM(df)$  indicate the  $Q$  test of comparison of the effects of the mean age of the participants in each study (i.e.,  $\beta_{Age}$ ) and the percentage of women of each study (i.e.,  $\beta_{Women}$ ). Int., represents the slope of the analysis. The variable not included here was due to no having reached the minimum condition for moderation analyses (i.e.,  $k > 3$ ).



## CE META-ANALYSIS

### Supplementary Table S5.

*Pooled Correlations between Collective Effervescence and Criterion Variables Moderated by National Levels Of Power Distance Index and Individualism.*

| Dimension                | Variable          | Residual Heterogeneity                 | Test of Moderators                   | <i>k</i>                            | <i>N</i> | Estimate                               | Effect Size                                                               |                                                                          |
|--------------------------|-------------------|----------------------------------------|--------------------------------------|-------------------------------------|----------|----------------------------------------|---------------------------------------------------------------------------|--------------------------------------------------------------------------|
|                          |                   | <i>QE(df)</i>                          | <i>QM(df)</i>                        |                                     |          |                                        | <i>r</i> [95% CI]                                                         |                                                                          |
| <i>Proximal Outcomes</i> |                   |                                        |                                      |                                     |          |                                        |                                                                           |                                                                          |
| Individual Emotions      | Arousal           | <i>QE</i> (10)=153.976, <i>p</i> <.001 | <i>QM</i> (2)=0.505, <i>p</i> =.777  | 13                                  | 1745     | Int.<br>$\beta_{PDI}$<br>$\beta_{IND}$ | 1.576 [-1.584, 4.735]<br>-0.018 [-0.069, 0.033]<br>-0.002 [-0.013, 0.010] |                                                                          |
|                          | Negative Emotions | <i>QE</i> (10)=53.271, <i>p</i> <.001  | <i>QM</i> (2)=1.230, <i>p</i> =.541  | 13                                  | 1878     | Int.<br>$\beta_{PDI}$<br>$\beta_{IND}$ | -1.131[-3.250, 0.987]<br>0.020 [-0.018, 0.058]<br>0.000 [-0.009, 0.010]   |                                                                          |
|                          | Positive Emotions | <i>QE</i> (17)=141.460, <i>p</i> <.001 | <i>QM</i> (2)=5.929, <i>p</i> =.052  | 20                                  | 5586     | Int.<br>$\beta_{PDI}$<br>$\beta_{IND}$ | 1.234 [0.412, 2.056]<br>-0.006 [-0.018, 0.007]<br>-0.006 [-0.011, -0.001] |                                                                          |
|                          | ST Emotions       | <i>QE</i> (14)=158.974, <i>p</i> <.001 | <i>QM</i> (2)=1.362, <i>p</i> =.506  | 17                                  | 5340     | Int.<br>$\beta_{PDI}$<br>$\beta_{IND}$ | 0.813 [-0.002, 1.629]<br>-0.004 [-0.014, 0.006]<br>-0.000 [-0.007, 0.007] |                                                                          |
|                          | Ingroup ID        | <i>QE</i> (8)=51.783, <i>p</i> <.001   | <i>QM</i> (2)=0.853, <i>p</i> =.653  | 11                                  | 1931     | Int.<br>$\beta_{PDI}$<br>$\beta_{IND}$ | 0.761 [-0.115, 1.636]<br>-0.004 [-0.017, 0.008]<br>0.001 [-0.006, 0.007]  |                                                                          |
|                          | FI Verbal         | <i>QE</i> (3)=3.719, <i>p</i> =.293    | <i>QM</i> (1)=2.804, <i>p</i> =.094  | 5                                   | 1031     | Int.<br>$\beta_{PDI}$<br>$\beta_{IND}$ | 1.686 [0.525, 2.847]<br>-0.017 [-0.037, 0.003]<br>-                       |                                                                          |
|                          | Communal Sharing  | FI Pictorial                           | <i>QE</i> (8)=14.313, <i>p</i> =.074 | <i>QM</i> (2)=6.380, <i>p</i> =.041 | 11       | 1504                                   | Int.<br>$\beta_{PDI}$<br>$\beta_{IND}$                                    | 1.021 [0.045, 1.997]<br>-0.010 [-0.021, 0.000]<br>-0.000 [-0.009, 0.008] |
|                          |                   | Social Support                         | <i>QE</i> (3)=15.838, <i>p</i> =.001 | <i>QM</i> (2)=1.867, <i>p</i> =.393 | 6        | 1648                                   | Int.<br>$\beta_{PDI}$<br>$\beta_{IND}$                                    | -0.370 [-1.418, 0.678]<br>0.005 [-0.006, 0.017]<br>0.007 [-0.005, 0.018] |

## CE META-ANALYSIS

### *Distal Outcomes*

|                           |                       |                         |                        |    |      |               |                         |
|---------------------------|-----------------------|-------------------------|------------------------|----|------|---------------|-------------------------|
|                           | Negative Climate      | $QE(2)=2.100, p=.350$   | $QM(2)=17.867, p<.001$ | 5  | 1357 | Int.          | 0.653 [-0.239, 1.545]   |
| Collective Emotions       | Positive Climate      | $QE(1)=2.301, p=.129$   | $QM(2)=11.982, p=.003$ | 4  | 1159 | $\beta_{PDI}$ | -0.004 [-0.020, 0.012]  |
|                           |                       |                         |                        |    |      | $\beta_{IND}$ | -0.007 [-0.011, -0.003] |
|                           |                       |                         |                        |    |      | Int.          | 1.994 [3.443, -0.545]   |
|                           |                       |                         |                        |    |      | $\beta_{PDI}$ | 0.034 [0.009, 0.058]    |
|                           |                       |                         |                        |    |      | $\beta_{IND}$ | 0.004 [-0.001, 0.010]   |
| Social Integration        | Ingroup Commitment    | $QE(2)=4.217, p=.121$   | $QM(1)=3.044, p=.081$  | 4  | 1320 | Int.          | 0.715 [0.329, 1.101]    |
|                           |                       |                         |                        |    |      | $\beta_{PDI}$ | -0.007 [-0.014, 0.001]  |
|                           |                       |                         |                        |    |      | $\beta_{IND}$ | -                       |
|                           | Ingroup ID (extended) | $QE(4)=56.812, p<.001$  | $QM(2)=0.267, p=.875$  | 7  | 1943 | Int.          | 0.635 [-0.804, 2.074]   |
|                           |                       |                         |                        |    |      | $\beta_{PDI}$ | -0.003 [-0.016, 0.009]  |
|                           |                       |                         |                        |    |      | $\beta_{IND}$ | -0.003 [-0.017, 0.012]  |
|                           | ST Beliefs            | $QE(2)=32.266, p<.001$  | $QM(1)=0.800, p=.371$  | 4  | 3736 | Int.          | -0.034 [-1.190, 1.122]  |
|                           |                       |                         |                        |    |      | $\beta_{PDI}$ | 0.008 [-0.010, 0.026]   |
|                           |                       |                         |                        |    |      | $\beta_{IND}$ | -                       |
|                           | ST Values             | $QE(2)=2.695, p=.260$   | $QM(1)=0.004, p=.951$  | 4  | 1103 | Int.          | 0.348 [-0.078, 0.774]   |
|                           |                       |                         |                        |    |      | $\beta_{PDI}$ | -0.000 [-0.006, 0.005]  |
|                           |                       |                         |                        |    |      | $\beta_{IND}$ | -0.001 [-0.009, 0.007]  |
| Social Values and Beliefs | Purpose in Life       | $QE(2)=0.179, p=.914$   | $QM(2)=1.464, p=.481$  | 5  | 3561 | Int.          | 0.543 [-0.208, 1.294]   |
|                           |                       |                         |                        |    |      | $\beta_{PDI}$ | -0.002 [-0.009, 0.005]  |
|                           |                       |                         |                        |    |      | $\beta_{IND}$ | -0.003 [-0.010, 0.003]  |
|                           | Spirituality          | $QE(2)=10.765, p=.005$  | $QM(2)=0.534, p=.766$  | 5  | 1416 | Int.          | 1.285 [-1.216, 3.786]   |
|                           |                       |                         |                        |    |      | $\beta_{PDI}$ | -0.009 [-0.032, 0.015]  |
|                           |                       |                         |                        |    |      | $\beta_{IND}$ | -0.007 [-0.029, 0.016]  |
|                           | Vitality              | $QE(3)=6.411, p=.093$   | $QM(1)=0.335, p=.563$  | 5  | 1411 | Int.          | 0.372 [-0.099, 0.844]   |
|                           |                       |                         |                        |    |      | $\beta_{PDI}$ | -0.002 [-0.009, 0.005]  |
| Empowerment               | Wellbeing             | $QE(9)=109.609, p<.001$ | $QM(2)=0.009, p=.995$  | 12 | 5025 | $\beta_{IND}$ | -                       |
|                           |                       |                         |                        |    |      | Int.          | 0.369 [-1.317, 2.054]   |
|                           |                       |                         |                        |    |      | $\beta_{PDI}$ | -0.001 [-0.018, 0.016]  |

## CE META-ANALYSIS

|                     |                       |                       |   |      |               |                         |
|---------------------|-----------------------|-----------------------|---|------|---------------|-------------------------|
| Collective Efficacy | $QE(5)=9.856, p=.079$ | $QM(1)=4.163, p=.041$ | 7 | 1471 | $\beta_{IND}$ | -0.000 [-0.014, 0.014]  |
|                     |                       |                       |   |      | Int.          | 2.041 [0.533, 3.549]    |
|                     |                       |                       |   |      | $\beta_{PDI}$ | -0.027 [-0.053, -0.001] |
|                     |                       |                       |   |      | $\beta_{IND}$ | -                       |

*Note.*  $k$  is the number of studies and  $N$  the number of participants included in the analysis.  $r$  [95% CI] indicates pooled Pearson's  $r$ s and their 95% confidence intervals.  $QE(df)$  indicate the  $Q$  test of the residual heterogeneity test (i.e., after the moderation) and its degrees of freedom;  $QM(df)$  indicate the  $Q$  test of the effects of national-level cultural dimensions of Power Distance Index (i.e.,  $\beta_{PDI}$ ) and Individualism (i.e.,  $\beta_{IND}$ ). Int., represents the slope of the analysis. Dashes indicate that there were no values for country where the association was evaluated. The variable not included here was due to no having values in the country-level indicators.
